# Supplementary material for: Shrimp lectin (Md-Lec) conjugated copper sulfide nanoparticles enhance the elimination of aquatic pathogens in infected Nile tilapia (Oreochromis niloticus)
Source: Royal Society of Chemistry journal article supplement (doi:10.1039/d0ra06853e), 2020-01-01
Supplement: d0ra06853e1.pdf [file d0ra06853e1.pdf]

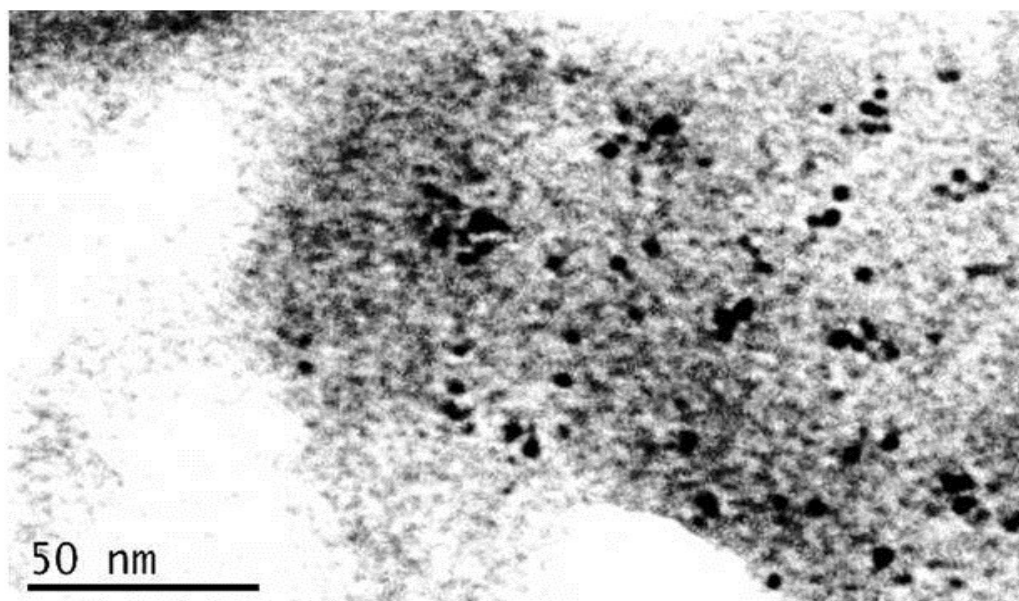

Supporting Fig. S1: TEM image of pCuS NPs. It shows that particles are spherical and the particle size range from 3-14 nm.

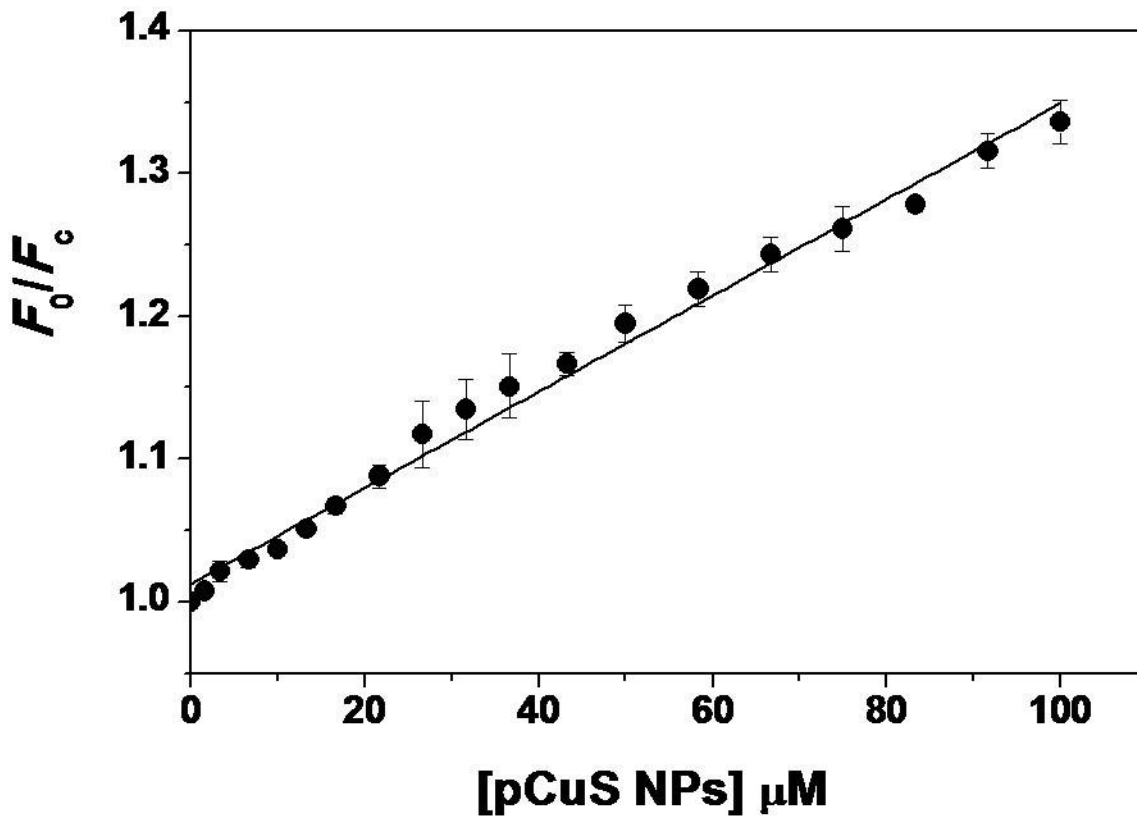

Supporting Fig. S2: Stern-Volmer plot. The linear plot indicates the interaction is static ( $R^2 = 0.9902$ ). The experiments are performed in triplicate.
